# Supplementary material
Source: publisher site journal article supplement (https://www.dovepress.com/article/417298)
Supplement: Supplementary file 1 [file get_supplementary_file.php]

**Supplementary Materials**

...

Record identified using PubMed, SCOPUS, EMBASE and EBSCO/CINAHL database search (n= 718)

Abstracts excluded due to duplication or not original articles. (n= 457)

Record screened. (n= 261)

Abstracts excluded due to irrelevant, non-English, and non-human studies (n= 211)

Full text articles evaluated for admissibility (n=50)

Full text articles excluded due to not mentioning required PK data in studies (n= 29)

Studies included for review (n= 21)

**Figure S1** A PRISMA Diagram for the Study Selection Process

**Table S1** Important Data From Published Pharmacokinetics Studies of Gentamicin in Critically Ill Patients

| Study | Patient information | | | | PK parameters, Mean ±SD (range) | | | Pharmacokinetic study |
| --- | --- | --- | --- | --- | --- | --- | --- | --- |
| Settings | n | Patients | Weight (kg) | Vd (L/Kg) | Ke (h-1) | CL (L/h) |
| Townsend, 1989 14 | Trauma | 44 | Multiple trauma or closed head injury, documented infections  Age: 38.2±22.1 (16-92) yo | TBW:71.5±16.4  IBW: 63.1±11.9 | 0.36±0.10 | NA | 7.38±2.76  (2.16-12.84) | After the first dose |
| Sangha, 1995 15 | Trauma/SICU | 7 | Open fracture, prophylactic therapy  Age: 18-70 yo  APACHE II score: 6–19 | NA (non-obese, weight within 20% of IBW) | 0.40±0.10 | 0.19±0.05 | NA | First dose |
| 6 | Open fracture, prophylactic therapy  Age: 18-39 yo  APACHE II score: 6–18 | NA (non-obese, weight within 20% of IBW) | 0.47±0.14 | 0.18±0.05 | NA | First dose |
| Finnell, 1998 16 | Trauma | 49 | Multiple trauma, empiric or documented infections  Age: 43.0±15.9 yo  CLcr: 89.5±20.6 mL/min/m2 | TBW: 81.3±24.5  DW: 72.0±14.4 | 0.28±0.09 | 0.26±0.08 | NA | First dose |
| Niemiec, 1987 17 | SICU | 100 | Documented Gram-negative bacterial infections  Age: 19-91 yo  APS score > 12 | TBW: 71±15.7 | 0.34±0.12  (0.12–0.83) | 0.148±0.095  (0.011–0.423) | NA | First dose |
| Deeter, 1989 18 | SICU | 30 | Post-operative, empiric or documented therapy  Age: 58±17 yo  Scr: 1.5±1.2 mg/dL | TBW: 78.4±14.7  IBW: 66.0±10.7 | 0.33±0.14 | 0.17±0.10 | NA | After the third dose |
| Triginer, 1989 19 | SICU | 25 | Post-operative open-heart surgery, empiric bacterial infections  Age: N/A | NA | 0.35±0.01 | NA | NA | 48 hours post-surgery |
| Triginer, 199120 | SICU | 13 | Post-operative open-heart surgery with ventilator support for > 32 hours after surgery  Age: 55.4±10.9 yo  CLcr: 60.8±18.9 mL/min | TBW: 66.9±6.5 | 0.36±0.08 | 0.200±0.049 | 0.059±0.035 L/kg/h | after 32 hours postoperative period |
| SICU | 10 | Post-operative open-heart surgery and spontaneous breathing within 12 hours after surgery  Age:58.9±12.3 (32-76) yo  CLcr: 71.4±13.4 mL/min | TBW: 63±10.1 | 0.24±0.05 | 0.251±0.046 | 0.058±0.007 L/kg/h |
| Oparaoji, 1998 21 | SICU | 4 | Post-operative, septic shock  Age: 71.6±6.4 yo  CLcr: 55.7±15.4 mL/min | DW: 63.8±4.8 | 0.46±0.13 | 0.08±0.05 | 2.35±1.23 | First dose |
| SICU | 4 | Post-operative, septic shock  Age: 70±8.5 yo  CLcr: 52.6±24.2 mL/min | DW: 63±4.5 | 0.41±0.18 | 0.12±0.07 | 3.13±1.7 | After the third dose |
| Mann,  1998 22 | SICU | 60 | Empiric or documented bacterial infections  Age: 57±16 yo  CLcr: 58±34 mL/min | TBW: 77±22  LBW: 63±11 | 23±9 L | 0.188±0.157  (0.14–0.21) | 3.72±2.94 | Steady state |
| Dorman, 199823 | SICU | 52 | Gram-negative infections  Age: 61.2±2 yo  APACHE II: 13±0.6  CLcr: 64.9±5 mL/min | TBW: 77.5±2.4  IBW: 70.4±1.5 | Median 0.29  (0.2– 0.54) | 0.16±0.01 | NA | After the first dose |
| Tang,  199924 | SICU | 52 | Post-operative, sepsis with hyperdynamic state  Age: 69.8±10.6 yo  APACHE II: 22.8±8.4  APS: 13.5±4.5  CI: 4.09±0.59 L/min/m2 | TBW: 63.2±12.5 | 0.48±0.2 | 0.09±0.10 | NA | within 48 hours after ICU admission |
| SICU | 25 | Post-operative, sepsis with hypodynamic state  Age: 72±9.8 yo  APACHE II: 19.3±7.9  APS: 10.4±4.0  CI: 2.70±0.43 L/min/m2 | TBW: 63.5±13.7 | 032±0.15 | 0.13±0.08 | NA | within 48 hours after ICU admission |
| SICU | 27 | Post-operative with mechanical ventilator support (non-sepsis)  Age: 62.3±12.4 yo  APACHE II: 10.5±0.73  APS: 3.4±0.31  CI: 2.40±0.20 L/min/m2 | TBW: 57.4±10.4 | 0.29±0.11 | 0.24±0.06 | NA | within 48 hours after ICU admission |
| Chelluri, 198725 | SICU and MICU | 10 | Sepsis  Age: N/A | NA | 0.37±0.13  (0.2-0.6) | N/A | N/A | First dose |
| Hassan, 198726 | SICU and MICU | 20 | Empiric or documented bacterial infections  Age: 68±15.1 yo,  CLcr: 50.6±23.1 mL/min | TBW: 64.2 | 0.32±0.09 | N/A | 3.24± 1.8 | After the first dose |
| Chelluri, 198927 | SICU and MICU | 14 | Gram-negative sepsis  Age: 63±15 yo  CLcr: 47±20 mL/min | TBW: 59±13 | 0.32±0.1 | 0.186±0.07 | N/A | First dose |
| Rodvold, 199028 | SICU and MICU | 15 | Presumed or documented Gram-negative infection  Age: 57.9±17.2 yo  CLcr: 70.8±49.4 mL/min/1.73 m2 | TBW: 71.1±15.9  DW: 65.3±8.9 | 0.46±0.19 | 0.208±0.130 | 5.77±3.15 L/h/1.73m2 | First dose |
| Zarowitz, 199329 | SICU and MICU | 20 | Gram-negative infection  Age: 50±16.9 yo  Scr: 1.2±1.1 (0.3-5.4) mg/dl | TBW:77.7±16.5 | 25.5±9.6 L | 0.22±0.12 | NA | Steady state |
| Buijk,  200230 | SICU and MICU | 96 | Gram-negative infection with CLcr > 60 mL/min  Age: 20-87 yo  APACHE II 17±4 | NA | 0.32±0.12 | 0.22±0.1 | 5.1± 2.4 | After the first dose |
| Wallace, 200231 | SICU and MICU | 30 | Bacterial infections  50% admitted in ICU  Age: 56.9±14.9 (24-80) yo  CLcr:97±31 mL/min | TBW: 80.7±20.2  DW: 71.2±9.9 | 0.46±0.14  (0.20-0.76) | 0.19±0.07  (0.05-0.47) | 6.72±2.64 | Steady state |
| 30 | Bacterial infections  33% admitted in ICU  Age: 71.1±12.2 (42-92) yo  CLcr: 48.5±5.7 mL/min | TBW: 81.6±28  DW: 68.4±17.1 | 0.40±0.17  (0.19-0.81) | 0.16±0.081  (0.05-0.36) | 4.45±1.51 |
| 30 | Bacterial infections  37% admitted in ICU  Age: 76.6±8.9 (57-93) yo  CLcr: 29.8±3.3 mL/min | TBW: 67.1±19.2  DW: 59.1±10.9 | 0.35±0.16  (0.19-0.81) | 0.12±0.05  (0.05-0.36) | 2.45±1.09 |
| van Maarseveen,  201532 | ICU | 124 | Sepsis (morning shift)  Age: 68±32 yo  SAPS II score: 40.7±13.4  CLcr: 55 (25-167) mL/min | TBW 72±28 | 0.33±0.11 | NA | 1.9± 0.06 | After the first or second dose |
| 145 | Sepsis (afternoon shift)  Age 65±28 yo  SAPS II score: 41±13.2  CLcr 64 (25-183) mL/min | TBW 75±26 | 0.32±0.10 | NA | 2.1± 0.08 |
| 142 | Sepsis (night shift)  Age: 68±31 yo  SAPS II score: 44.6±14.1  CLcr 57 (25-167) mL/min | TBW 75±24 | 0.33±0.12 | NA | 2.1± 0.07 |  |
| Triginer,  199033 | MICU | 40 | Gram-negative bacterial sepsis  Age: 63 (28-76) yo | TBW: 64.2+18.2 | 0.43±0.12 | NA | 0.07±0.02 L/kg/h | After 24 hours of therapy |
| 0.29±0.17 | NA | 0.05±0.01 L/kg/h | day 7 of therapy |
| Beckhouse, 198834 | MICU | 49 | Gram-negative bacterial sepsis  Age: N/A | NA | 0.25±0.07  (0.05-0.48) | NA | 0.076±0.031 L/kg/h | On day 2 or 3 of therapy |

Note: reported values are generally in mean and standard deviation

Abbreviations: APACHE II score = acute physiology and chronic health evaluation II score, APS = acute physiologic score, CL=clearance, CI = cardiac index, CLcr = creatinine clearance, DW = dosing weight, IBW = ideal body weight, ICU = intensive care unit, MICU = medical ICU, NA = Not available, Ke= elimination rate constant, TBW = total body weight, SAPS II = simplified acute physiology score II, Scr = serum creatinine, SD= standard deviation, SICU = surgical ICU, Vd= volume of distribution

**Table S2** Pharmacokinetic Parameters Used in This Study

| Parameters | Mean | SD | Lower range | Upper range |
| --- | --- | --- | --- | --- |
| Vd (L/kg) | 0.33 | 0.20 | 0.05 | 1.0 |
| CL (L/h) | 4.70 | 2.89 | 0.50 | 13.0 |
| Ke (h-1) | 0.18 | 0.10 | 0.05 | 0.55 |
| Body weight (kg) | 70.8 | 19.9 | 40 | Indefinite |
